# Supplementary material for: Activation of class 1 integron integrase is promoted in the intestinal environment
Source: PubMed Central journal article supplement (PMC9090394; doi:10.1371/journal.pgen.1010177), 2022-04-28
Supplement: pgen.1010177.s001.pdf [file pgen.1010177.s001.pdf]

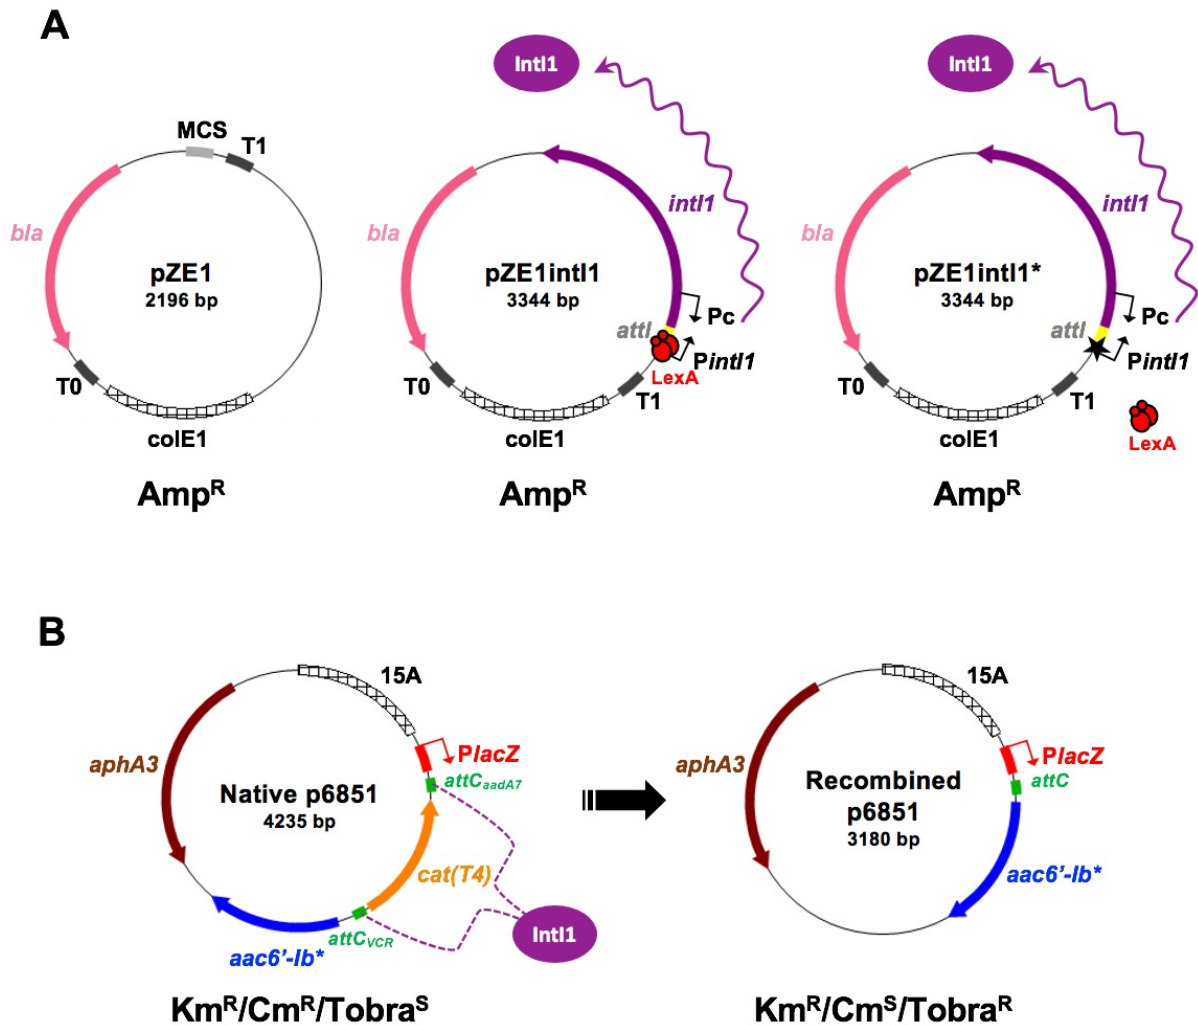

### S1 Fig. Recombination activity assay

**(A)** Description of pZE1 derivative plasmids : plasmid pZE1 (control plasmid that did not carry the *intl1* gene), plasmid pZE1*intl1* (expression of *intl1* from the LexA-regulated (SOS-regulated) wild-type integrase promoter *Pintl1*), and plasmid pZE1*intl1*\* (constitutive expression of *intl1* from the derepressed *Pintl1* carrying mutations in the LexA-binding site (indicated by a black star) inhibiting LexA binding); **(B)** Description of p6851 plasmid before (native p6851) and after recombination (Recombined p6851). Native p6851 carries a constitutively expressed *cat(T4)* gene located between two *attC* sites (*attC<sub>aadA7</sub>* and *attC<sub>VCR2</sub>*), a *PlacZ* promoter upstream of *attC<sub>aadA7</sub>* and, and the non-expressed *aac(6')-Ib\** gene downstream of *attC<sub>VCR2</sub>*. Recombined p6851 has lost the *attC<sub>aadA7</sub>-cat(T4)-attC<sub>VCR2</sub>* structure and allows the constitutive expression of the *aac(6')-Ib\** gene from *PlacZ*. For each plasmid, the resistance phenotype is indicated below in bold: *bla*, *aphA3*, *cat(T4)* and *aac(6')-Ib\** genes confer resistance to ampicillin (**Amp<sup>R</sup>**), kanamycin (**Km<sup>R</sup>**), chloramphenicol (**Cm<sup>R</sup>**) and tobramycin (**Tobra<sup>R</sup>**) respectively.

The integrase activity assay was performed as previously described [24]. *E. coli* MG1656 cells were freshly electroporated simultaneously with native p6851 plasmid and one of the pZE1-derivative. The assay is based on the IntI1<sub>R32\_H39</sub> integron integrase capability to excise the synthetic cassette *cat(T4)-attC<sub>VCR2</sub>* (carried on native p6851) by catalysing the specific recombination between the *attC<sub>aadA7</sub>* and *attC<sub>VCR2</sub>* sites, allowing functional aminoglycoside acetyltransferase-6' synthesis that confers selectable resistance to tobramycin (recombined p6851; expression of *aac(6')-Ib\** from *PlacZ* promoter). Integrase activity was determined as the frequency of recombinants calculated as the ratio of the CFU/ml or CFU/g of faeces (respectively for *in vitro* and *in vivo* assays) on LB + Tobra to the CFU/ml or CFU/g of faeces on LB + Amp + Km.
